# Supplementary material for: Effects of low-frequency vibration training on walking ability and body composition among older adults: a randomized controlled trial
Source: PeerJ. 2025 Apr 16;13:e19263. doi: 10.7717/peerj.19263 (PMC12009026; doi:10.7717/peerj.19263)
Supplement: Supplemental Information 1 [file peerj-13-19263-s001.xlsx]

## Sheet: Sheet1
No.	Group	age	height	pre-Weight	pos-Weight	pre-BMI	pos-BMI	pre-walk speed	pos-walk speed	pre-TUG	pos-TUG	pre-30-s CST	pos-30-s CST	pre-Fat%	pos-Fat%	pre-WC	pos-WC	pre-HC	pos-HC	pre-WHR	pos-WHR
			m	kg	kg	kg/m²	kg/m²	m/s	m/s	s	s	count	count			cm	cm	cm	cm	cm	cm
001	VG	87	1.527	49.2	48	20.7	20.6	1	1.19284	9.44	8.62	15	15	26.6	17	84	80.4	90	88.9	0.933333	0.904387
002	VG	82	1.59	60	57.3	23.1	22.4	0.864553	1.05079	14.85	12.54	8	10	22.4	23.3	97	90.6	103.5	99.8	0.937198	0.907816
003	VG	75	1.59	64.9	66.2	26.3	26.2	1.39211	2.72727	9.26	7.23	22	16	32.4	34.5	91	88.5	104	104.5	0.875	0.84689
004	VG	78	1.78	81	83.6	26.1	26.4	1.2987	1.36986	10.6	8.6	19	17	31.2	28.5	101	95.5	105.5	99.2	0.957346	0.962702
005	VG	79	1.76	80.2	81.1	25.6	26.2	1.39211	2.77778	8.5	6.54	13	15	30.7	32.6	98.1	94.5	103.5	101.8	0.947826	0.928291
006	VG	79	1.59	54.05	54.1	21.7	21.4	1.23967	2.3166	8.5	5.93	15	15	30.9	30.5	79.5	77.5	91.2	96	0.871711	0.807292
007	VG	81	1.63	74.6	75.4	27.7	28.4	0.823045	0.846262	14.78	9.49	10	14	34.3	17.3	103	99.5	99.6	107	1.03414	0.929907
008	VG	76	1.54	67.6	67.5	28.1	24.2	0.769231	0.97561	13.44	9.98	7	9	42.2	29.8	97	95.8	103.5	110	0.937198	0.870909
009	VG	76	1.52	54.45	57	22.7	24.6	0.918836	0.990099	13.53	9.06	10	18	25.9	35.6	92.7	78	96	94	0.965625	0.829787
010	VG	88	1.61	64.9	66.8	25	25.8	1.52284	2.06186	10.51	9.28	20	14	22.4	28.4	95.4	86.4	100	104.6	0.954	0.826004
011	VG	76	1.53	58.25	59.95	25.5	25.6	1.14943	2.15054	8.16	7.55	24	19	34	35.2	88	87.1	95	90.2	0.926316	0.965632
012	VG	79	1.65	52.25	56	19.7	19.7	1.53846	2.85714	8.5	7.83	17	21	15.5	16.1	78	76.5	90	87.6	0.866667	0.873288
013	VG	77	1.6	51.35	48.8	19.8	19.1	1.2474	2.20588	7.68	6.69	21	17	25.7	19.3	79.5	69.9	90.2	88.2	0.881375	0.792517
014	VG	80	1.62	62.85	63.1	24.6	24	1.48148	1.33333	8.72	6.85	15	17	37.6	37.4	90.3	93	96.2	110	0.938669	0.845455
015	VG	76	1.76	52.45	51.2	17.1	16.4	1.21457	2.20588	8.94	9.73	17	17	9.5	13.8	73.4	73.2	91.2	87	0.804825	0.841379
016	VG	75	1.6	58.9	60.1	23	23.5	1.27932	2.04778	8.29	8.63	17	15	31.7	31.5	91.8	87.5	98.1	102.5	0.93578	0.853659
017	VG	77	1.447	40.4	41.1	19	19.6	0.882353	0.923077	14.28	10.04	11	13	27.4	27.3	74	77.7	86	89.2	0.860465	0.871076
018	VG	85	1.64	59.15	59.15	22	22.2	1.49254	2.25564	9.2	7.15	17	19	22.6	30.6	79.9	82.3	98.1	101.3	0.814475	0.812438
019	VG	78	1.6	80.6	80.1	32.2	31.3	1.16959	1.53846	9	6.59	14	16	48.9	47.4	101.2	104.5	113.3	117.3	0.893204	0.890878
020	VG	76	1.56	60.35	60.55	25.4	24.9	1.17878	1.23967	11.7	9.35	11	14	37.6	37.5	88.1	87.8	98.3	94.8	0.896236	0.92616
021	CG	81	1.58	60.05	60.8	24.4	24.4	1.05448	0.988468	9.42	11.36	10	13	37.8	38.3	87	90.1	100	88.6	0.87	1.01693
022	CG	79	1.534	56.9	57.1	24.3	24.3	1.19284	1.15607	7.92	8.38	21	20	35.4	33.8	83	86.9	92	101.9	0.902174	0.852797
023	CG	84	1.5	50.95	51.75	22.6	23	0.687285	1.5	14.54	9.6	12	15	27.6	34.1	89	85.5	100	91.2	0.89	0.9375
024	CG	86	1.5	51.2	52.15	21.9	23.2	1.35135	0.765306	22.54	15.87	8	15	29.7	32.5	85	79.5	90	83.7	0.944444	0.949821
025	CG	79	1.66	73.45	75.65	26.7	27.5	1.30435	1.31868	8.54	9.8	10	12	40.1	42	100	95.8	103.1	106	0.969932	0.903774
026	CG	75	1.526	77.1	78.8	31.7	33.8	1.15607	0.884956	8.48	11.12	18	16	47.6	45	100	101.3	112	113.6	0.892857	0.891725
027	CG	76	1.71	78.05	77.1	27.7	24.2	1.05634	1.18577	10.42	10.63	16	11	34.7	29.8	104.1	99.8	110.9	96.6	0.938683	1.03313
028	CG	86	1.6	53.7	53.7	20.6	21	1	0.985222	9.33	11	23	17	13	16.7	78	77.7	94.5	90	0.825397	0.863333
029	CG	86	1.65	76.4	77.2	28.4	28.4	1.222	1.13852	10.98	11.03	11	10	35.8	33.9	105	105.4	109	99.8	0.963303	1.05611
030	CG	87	1.67	63.4	65.6	22.5	23.5	1.13636	0.978793	9.03	11.25	17	16	23.6	24.5	95.4	89.6	98.7	102.3	0.966565	0.875855
031	CG	88	1.63	57.45	55.9	21	21.9	1.17188	1.2474	8.53	8.65	27	18	15.8	19.7	73	74.6	93	89.5	0.784946	0.83352
032	CG	83	1.71	67.45	68.7	23.5	23.9	1.13636	1.38889	8.67	8.41	36	33	24.4	21.7	90.3	90.3	96.5	94.3	0.935751	0.957582
033	CG	79	1.57	56.9	57.45	23.7	23.3	1.5873	1.48515	7.6	8.4	12	6	40.2	39.8	88	84.1	102	96	0.862745	0.876042
034	CG	80	1.57	55.6	55.6	22.6	22.8	1.22449	1.14723	8.07	11.12	13	13	26.2	28.9	84	83.4	97	97.7	0.865979	0.853634
035	CG	77	1.62	67.45	67.45	25.7	27.2	2.01342	1.46699	8.42	9.08	16	11	38.6	37	95	99	110	102	0.863636	0.970588
036	CG	81	1.6	55.6	59.55	21.7	23.3	1.64384	1.2	7.85	11.06	12	18	23.4	22.2	85.4	92.1	100.4	90.1	0.850598	1.0222
037	CG	75	1.72	69	67.75	23.1	22.9	1.25786	1.13852	10.6	5.34	16	15	19.2	16.9	92.5	89.6	99	95	0.934343	0.943158
038	CG	81	1.57	70.4	70.4	28.6	29.3	2.04778	1.10294	8.24	9.54	15	14	43.9	45	98	92	102	106	0.960784	0.867925
